# Supplementary material for: Luminescence properties of 4-hydroxy-5-phenylpyrido[3,2,1-jk]carbazol-6-one: solvatochromism and sensitivity to amine solution
Source: Royal Society of Chemistry journal article supplement (doi:10.1039/c1pp05045a), 2011-06-17
Supplement: c1pp05045a.pdf [file c1pp05045a.pdf]

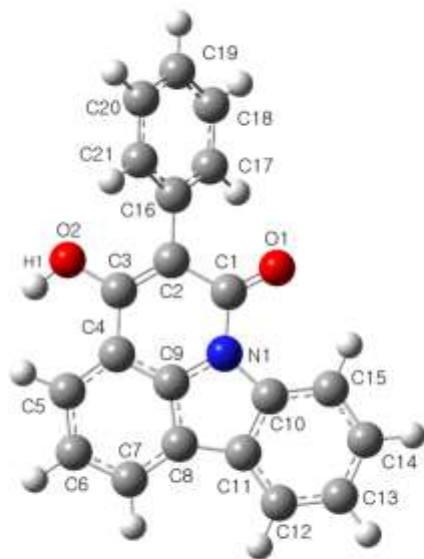

Figure S1. Optimized molecular structure of HPPCO.

Table S1. Selected bond lengths (Å), and bond and dihedral angles (°) of the neutral HPPCO molecule (atomic labeling is shown in Scheme S1).

| Definition    | Value    | Definition    | Value    | Definition      | Value    |
|---------------|----------|---------------|----------|-----------------|----------|
| C1-O1         | 1.2253   | C5-C6         | 1.3982   | C3-O2           | 1.3584   |
| C1-N1         | 1.4105   | C10-C15       | 1.3924   | C16-C17         | 1.4051   |
| C1-C2         | 1.4814   | C10-C11       | 1.4203   | C16-C21         | 1.4045   |
| N1-C9         | 1.3744   | C15-17        | 1.0814   | C17-C18         | 1.3932   |
| C9-C8         | 1.4069   | C2-C3         | 1.3788   | C21-C20         | 1.3936   |
| C9-C4         | 1.3921   | C2-C16        | 1.4875   | O2-H1           | 0.9659   |
| C8-C7         | 1.3947   | C4-C3         | 1.4518   | C7-C6           | 1.4036   |
| C4-C5         | 1.4077   |               |          |                 |          |
| O01-C1-N1     | 120.1822 | C9-C8-C11     | 105.5465 | C1-C2-C16       | 117.0499 |
| O1-C1-C2      | 124.8608 | C7-C8-C11     | 136.7237 | C3-C2-C16       | 121.7537 |
| N1-C1-C2      | 114.9557 | C9-C4-C5      | 115.8381 | C4-C3-C2        | 121.6819 |
| C1-N1-C9      | 122.5948 | C9-C4-C3      | 115.7458 | C4-C3-O2        | 119.1379 |
| C1-N1-C10     | 129.4874 | C5-C4-C3      | 128.4162 | C2-C3-O2        | 119.18   |
| C9-N1-C10     | 107.9165 | C8-C7-C6      | 118.844  | C2-C16-C17      | 120.757  |
| N1-C9-C8      | 111.1303 | C4-C5-C6      | 120.5956 | C2-C16-C21      | 120.906  |
| N1-C9-C4      | 123.8097 | C7-C6-C5      | 121.9301 | C17-C16-C21     | 118.3362 |
| C8-C9-C4      | 125.0599 | C1-C2-C3      | 121.1942 | C3-O2-H1        | 109.635  |
| C9-C8-C7      | 117.7296 |               |          |                 |          |
| O1-C1-N1-C9   | -179.861 | C4-C9-C8-C11  | -179.95  | C4-C5-C6-C7     | 0.2992   |
| O1-C1-N1-C10  | 0.5926   | N1-C9-C4-C5   | -179.394 | N1-C10-C11-C8   | -0.0697  |
| C2-C1-N1-C9   | -0.2585  | N1-C9-C4-C3   | 0.5728   | C1-C2-C3-C4     | 1.5591   |
| C2-C1-N1-C10  | -179.805 | C8-C9-C4-C5   | 0.5001   | C1-C2-C3-O2     | -178.282 |
| O1-C1-C2-C3   | 178.9272 | C8-C9-C4-C3   | -179.533 | C16-C2-C3-C4    | -179.01  |
| O1-C1-C2-C16  | -0.5298  | C9-C8-C7-C6   | -0.237   | C16-C2-C3-O2    | 1.1491   |
| N1-C1-C2-C3   | -0.6541  | C11-C8-C7-C6  | 179.5656 | C1-C2-C16-C17   | 46.7686  |
| N1-C1-C2-C16  | 179.8889 | C9-C8-C11-C10 | 0.0687   | C1-C2-C16-C21   | -132.895 |
| C1-N1-C9-C8   | -179.631 | C7-C8-C11-C10 | -179.75  | C3-C2-C16-C17   | -132.685 |
| C1-N1-C9-C4   | 0.2764   | C9-C4-C5-C6   | -0.5887  | C3-C2-C16-C21   | 47.6516  |
| C10-N1-C9-C8  | 0.001    | C3-C4-C5-C6   | 179.449  | C4-C3-O2-H1     | -9.7512  |
| C10-N1-C9-C4  | 179.9084 | C9-C4-C3-C2   | -1.4842  | C2-C3-O2-H1     | 170.0942 |
| C1-N1-C10-C11 | 179.642  | C9-C4-C3-O2   | 178.3572 | C2-C16-C17-C18  | 179.6126 |
| C9-N1-C10-C11 | 0.0437   | C5-C4-C3-C2   | 178.478  | C21-C16-C17-C18 | -0.7157  |
| N1-C9-C8-C7   | 179.8161 | C5-C4-C3-O2   | -1.6806  | C2-C16-C21-C20  | -179.873 |
| N1-C9-C8-C11  | -0.0435  | C8-C7-C6-C5   | 0.1349   | C17-C16-C21-C20 | 0.4556   |
| C4-C9-C8-C7   | -0.0899  |               |          |                 |          |

Table S2. Selected bond lengths (Å) and bond angles (°) of the deprotonated HPPCO molecule.

| Definition    | Value    | Definition    | Value    | Definition      | Value    |
|---------------|----------|---------------|----------|-----------------|----------|
| C1-O1         | 1.2415   | C8-C7         | 1.3995   | C2-C3           | 1.4525   |
| C1-N1         | 1.4421   | C4-C5         | 1.3975   | C2-C16          | 1.4848   |
| C1-C2         | 1.4463   | C4-C3         | 1.493    | C3-O2           | 1.2515   |
| C3-C9         | 1.3728   | C7-C6         | 1.4014   | C16-C17         | 1.4145   |
| C9-C8         | 1.4087   | C5-C6         | 1.4047   | C16-C21         | 1.4146   |
| C9-C4         | 1.3867   |               |          |                 |          |
| O1-C1-N1      | 116.0646 | C9-C4-C3      | 118.9204 | C3-C2-C16       | 119.3329 |
| O1-C1-C2      | 127.9695 | C5-C4-C3      | 125.0747 | C4-C3-C2        | 116.4548 |
| N1-C1-C2      | 115.9636 | C8-C7-C6      | 118.6626 | C4-C3-O2        | 117.4425 |
| C1-N1-C9      | 122.2893 | C4-C5-C6      | 120.7815 | C2-C3-O2        | 126.1006 |
| N1-C9-C4      | 123.3996 | C7-C6-C5      | 121.7798 | C2-C16-C17      | 122.2343 |
| C8-C9-C4      | 125.1628 | C1-C2-C3      | 122.9565 | C2-C16-C21      | 121.4091 |
| C9-C8-C7      | 117.6093 | C1-C2-C16     | 117.7105 | C17-C16-C21     | 116.3543 |
| C9-C4-C5      | 116.004  |               |          |                 |          |
| O1-C1-N1-C9   | 179.8385 | C4-C9-C8-C7   | 0.0803   | C8-C7-C6-C5     | -0.0882  |
| O1-C1-N1-C10  | -0.6805  | C4-C9-C8-C11  | -179.93  | C4-C5-C6-C7     | 0.1316   |
| C2-C1-N1-C9   | 0.3433   | N1-C9-C4-C5   | 179.9703 | N1-C10-C11-C8   | -0.0089  |
| C2-C1-N1-C10  | 179.8243 | N1-C9-C4-C3   | -0.3473  | C1-C2-C3-C4     | -1.4393  |
| O1-C1-C2-C3   | -178.76  | C8-C9-C4-C5   | -0.0399  | C1-C2-C3-O2     | 179.1093 |
| O1-C1-C2-C16  | 1.1406   | C8-C9-C4-C3   | 179.6425 | C16-C2-C3-C4    | 178.6621 |
| N1-C1-C2-C3   | 0.6653   | C9-C8-C7-C6   | -0.0138  | C16-C2-C3-O2    | -0.7893  |
| N1-C1-C2-C16  | -179.435 | C11-C8-C7-C6  | -180     | C1-C2-C16-C17   | 28.9722  |
| C1-N1-C9-C8   | 179.5128 | C9-C8-C11-C10 | -0.0306  | C1-C2-C16-C21   | -151.594 |
| C1-N1-C9-C4   | -0.4962  | C7-C8-C11-C10 | 179.9567 | C3-C2-C16-C17   | -151.124 |
| C10-N1-C9-C8  | -0.0684  | C9-C4-C5-C6   | -0.0656  | C3-C2-C16-C21   | 28.31    |
| C10-N1-C9-C4  | 179.9227 | C3-C4-C5-C6   | -179.726 | C2-C16-C17-C18  | 179.5485 |
| C1-N1-C10-C11 | -179.493 | C9-C4-C3-C2   | 1.2595   | C21-C16-C17-C18 | 0.0876   |
| C9-N1-C10-C11 | 0.0464   | C9-C4-C3-O2   | -179.24  | C2-C16-C21-C20  | -179.741 |
| N1-C9-C8-C7   | -179.929 | C5-C4-C3-C2   | -179.089 | C17-C16-C21-C20 | -0.2751  |
| N1-C9-C8-C11  | 0.0614   | C5-C4-C3-O2   | 0.4112   |                 |          |

Table S3. Some DFT molecular orbitals calculated for neutral HPPCO molecule.

| MO         | hartree | % contribution from each part of the compound |                |                |                |    |                |                |                |   |                |                |                |    |                |                |                |
|------------|---------|-----------------------------------------------|----------------|----------------|----------------|----|----------------|----------------|----------------|---|----------------|----------------|----------------|----|----------------|----------------|----------------|
|            |         | 15C                                           |                |                |                | 6C |                |                |                | N |                |                |                | 2O |                |                |                |
|            |         | s                                             | p <sub>x</sub> | p <sub>y</sub> | p <sub>z</sub> | s  | p <sub>x</sub> | p <sub>y</sub> | p <sub>z</sub> | s | p <sub>x</sub> | p <sub>y</sub> | p <sub>z</sub> | s  | p <sub>x</sub> | p <sub>y</sub> | p <sub>z</sub> |
| <i>l8</i>  | 0.067   | 0                                             | 0              | 0              | 94             | 0  | 0              | 1              | 1              | 0 | 0              | 0              | 1              | 0  | 0              | 0              | 2              |
| <i>l7</i>  | 0.034   | 0                                             | 0              | 0              | 12             | 0  | 4              | 38             | 44             | 0 | 0              | 0              | 1              | 0  | 0              | 0              | 1              |
| <i>l6</i>  | 0.033   | 0                                             | 0              | 0              | 19             | 0  | 3              | 34             | 39             | 0 | 0              | 0              | 2              | 0  | 0              | 0              | 1              |
| <i>l4</i>  | 0.022   | 0                                             | 0              | 0              | 80             | 0  | 1              | 8              | 9              | 0 | 0              | 0              | 1              | 0  | 0              | 0              | 0              |
| <i>l3</i>  | 0.014   | 0                                             | 0              | 0              | 90             | 0  | 0              | 0              | 0              | 0 | 0              | 0              | 0              | 0  | 0              | 0              | 9              |
| <i>l2</i>  | 0.001   | 0                                             | 0              | 0              | 91             | 0  | 0              | 2              | 2              | 0 | 0              | 0              | 4              | 0  | 0              | 0              | 0              |
| <i>l1</i>  | -0.036  | 0                                             | 0              | 0              | 88             | 0  | 0              | 2              | 1              | 0 | 0              | 0              | 1              | 0  | 0              | 0              | 7              |
| <i>h1</i>  | -0.290  | 0                                             | 0              | 0              | 52             | 0  | 2              | 15             | 18             | 0 | 0              | 0              | 2              | 0  | 0              | 0              | 11             |
| <i>h2</i>  | -0.304  | 0                                             | 0              | 0              | 98             | 0  | 0              | 0              | 0              | 0 | 0              | 0              | 1              | 0  | 0              | 0              | 0              |
| <i>h3</i>  | -0.314  | 0                                             | 0              | 0              | 67             | 0  | 1              | 5              | 6              | 0 | 0              | 0              | 16             | 0  | 0              | 0              | 4              |
| <i>h4</i>  | -0.326  | 0                                             | 0              | 0              | 0              | 0  | 4              | 43             | 49             | 0 | 0              | 0              | 0              | 0  | 3              | 0              | 0              |
| <i>h5</i>  | -0.338  | 0                                             | 0              | 1              | 50             | 0  | 2              | 21             | 21             | 0 | 0              | 0              | 0              | 0  | 0              | 0              | 3              |
| <i>h6</i>  | -0.364  | 0                                             | 0              | 0              | 84             | 0  | 1              | 4              | 3              | 0 | 0              | 0              | 3              | 0  | 0              | 0              | 5              |
| <i>h7</i>  | -0.366  | 1                                             | 8              | 3              | 0              | 0  | 2              | 2              | 2              | 0 | 1              | 3              | 0              | 0  | 73             | 4              | 0              |
| <i>h8</i>  | -0.393  | 0                                             | 0              | 0              | 81             | 0  | 0              | 1              | 1              | 0 | 0              | 0              | 0              | 0  | 0              | 0              | 16             |
| <i>h9</i>  | -0.427  | 0                                             | 1              | 1              | 43             | 0  | 3              | 1              | 0              | 0 | 0              | 0              | 20             | 0  | 0              | 0              | 29             |
| <i>h10</i> | -0.437  | 1                                             | 43             | 7              | 3              | 0  | 14             | 5              | 2              | 0 | 0              | 0              | 2              | 1  | 8              | 1              | 1              |

Table S4. ZINDO electronic states and predominant transitions of neutral HPPCO molecule.

| State          | nm  | f     | Predominant transition                                    | comment                                                                                                                    |
|----------------|-----|-------|-----------------------------------------------------------|----------------------------------------------------------------------------------------------------------------------------|
| (A-absorption) |     |       |                                                           |                                                                                                                            |
| 1A             | 361 | 0.294 | $h1 \rightarrow l1$                                       | $\pi(R3,4;O;ph) \rightarrow \pi^*(R1-4)$                                                                                   |
| 2A             | 353 | 0.104 | $h7 \rightarrow l1, l3$                                   | $n(O) \rightarrow \pi^*(R1-4), \pi^*(R1,3,4)$                                                                              |
| 3A             | 324 | 0.235 | $h2 \rightarrow l1$                                       | $\pi(R1-3) \rightarrow \pi^*(R1-4)$                                                                                        |
| B-absorption   |     |       |                                                           |                                                                                                                            |
| 4A             | 311 | 0.092 | $h3 \rightarrow l1$                                       | $\pi(R1-4,N) \rightarrow \pi^*(R1-4)$                                                                                      |
| 5A             | 284 | 0.016 | $h3 \rightarrow l2; h2 \rightarrow l4$                    | $\pi(R1-4,N) \rightarrow \pi^*(R1-4);$<br>$\pi(R1-3) \rightarrow \pi^*(R1,3,4)$                                            |
| 6A             | 279 | 0.006 | $h4 \rightarrow l1, l5, l6; h1 \rightarrow l6, l5$        | $\pi(ph) \rightarrow \pi^*(R1-4), \pi^*(R1,2), \pi^*(ph);$<br>$\pi(R3,4;O;ph) \rightarrow \pi^*(ph), \pi^*(R1,2)$          |
| 7A             | 274 | 0.275 | $h3 \rightarrow l1; h2 \rightarrow l2; h1 \rightarrow l2$ | $\pi(R1-4,N) \rightarrow \pi^*(R1-4);$<br>$\pi(R1-3) \rightarrow \pi^*(R1-4);$<br>$\pi(R3,4;O;ph) \rightarrow \pi^*(R1-4)$ |
| 8A             | 266 | 0.352 | $h1 \rightarrow l3, l2$                                   | $\pi(R3,4;O;ph) \rightarrow \pi^*(R1,3,4)$                                                                                 |
| 9A             | 259 | 0.363 | $h2 \rightarrow l2$                                       | $\pi(R1-3) \rightarrow \pi^*(R1-4)$                                                                                        |
| 10A            | 256 | 0.001 | $h5 \rightarrow l1$                                       | $\pi(R1,3,4;ph) \rightarrow \pi^*(R1-4)$                                                                                   |
| (C-absorption) |     |       |                                                           |                                                                                                                            |
| 11A            | 245 | 0.314 | $h5 \rightarrow l1; h1 \rightarrow l4$                    | $\pi(R1,3,4;ph) \rightarrow \pi^*(R1-4);$<br>$\pi(R3,4;O;ph) \rightarrow \pi^*(R1,3,4)$                                    |
| 12A            | 242 | 0.215 | $h2 \rightarrow l3$                                       | $\pi(R1-3) \rightarrow \pi^*(R1,3,4)$                                                                                      |
| 13A            | 240 | 0.090 | $h4 \rightarrow l1$                                       | $\pi(ph) \rightarrow \pi^*(R1-4)$                                                                                          |
| 14A            | 238 | 0.011 | $h1 \rightarrow l8$                                       | $\pi(R3,4;O;ph) \rightarrow \pi^*(R1-4)$                                                                                   |
| 15A            | 233 | 0.129 | $h2 \rightarrow l3; h3 \rightarrow l4$                    | $\pi(R1-3) \rightarrow \pi^*(R1,3,4);$<br>$\pi(R1-4,N) \rightarrow \pi^*(R1-4)$                                            |
| 16A            | 229 | 0.794 | $h3 \rightarrow l2$                                       | $\pi(R1-4,N) \rightarrow \pi^*(R1-4)$                                                                                      |
| 17A            | 227 | 0.066 | $h2 \rightarrow l7; h3 \rightarrow l3$                    | $\pi(R1-3) \rightarrow \pi^*(R1-4);$<br>$\pi(R1-4,N) \rightarrow \pi^*(R1,3,4)$                                            |

Table S5. Some DFT molecular orbitals calculated for deprotonated HPPCO molecule.

| MO        | hartree | % contribution from each part of the compound |                |                |                |    |                |                |                |   |                |                |                |    |                |                |                |
|-----------|---------|-----------------------------------------------|----------------|----------------|----------------|----|----------------|----------------|----------------|---|----------------|----------------|----------------|----|----------------|----------------|----------------|
|           |         | 15C                                           |                |                |                | 6C |                |                |                | N |                |                |                | 2O |                |                |                |
|           |         | s                                             | p <sub>x</sub> | p <sub>y</sub> | p <sub>z</sub> | s  | p <sub>x</sub> | p <sub>y</sub> | p <sub>z</sub> | s | p <sub>x</sub> | p <sub>y</sub> | p <sub>z</sub> | s  | p <sub>x</sub> | p <sub>y</sub> | p <sub>z</sub> |
| <i>l7</i> | 0.162   | 0                                             | 0              | 0              | 80             | 0  | 0              | 0              | 3              | 0 | 0              | 0              | 4              | 0  | 0              | 0              | 12             |
| <i>l6</i> | 0.151   | 0                                             | 0              | 0              | 0              | 0  | 1              | 19             | 80             | 0 | 0              | 0              | 0              | 0  | 0              | 0              | 0              |
| <i>l5</i> | 0.148   | 0                                             | 0              | 0              | 21             | 0  | 1              | 14             | 58             | 0 | 0              | 0              | 2              | 0  | 0              | 0              | 3              |
| <i>l4</i> | 0.134   | 0                                             | 0              | 0              | 94             | 0  | 0              | 0              | 0              | 0 | 0              | 0              | 0              | 0  | 0              | 0              | 5              |
| <i>l3</i> | 0.125   | 0                                             | 0              | 0              | 84             | 0  | 0              | 2              | 8              | 0 | 0              | 0              | 4              | 0  | 0              | 0              | 2              |
| <i>l2</i> | 0.111   | 0                                             | 0              | 0              | 97             | 0  | 0              | 0              | 1              | 0 | 0              | 0              | 0              | 0  | 0              | 0              | 2              |
| <i>l1</i> | 0.087   | 0                                             | 0              | 0              | 95             | 0  | 0              | 0              | 0              | 0 | 0              | 0              | 0              | 0  | 0              | 0              | 4              |
| <i>h1</i> | -0.138  | 0                                             | 0              | 0              | 46             | 0  | 1              | 7              | 22             | 0 | 0              | 0              | 1              | 0  | 0              | 0              | 23             |
| <i>h2</i> | -0.196  | 0                                             | 0              | 0              | 70             | 0  | 0              | 0              | 0              | 0 | 0              | 0              | 21             | 0  | 0              | 0              | 9              |
| <i>h3</i> | -0.198  | 0                                             | 0              | 0              | 96             | 0  | 0              | 0              | 0              | 0 | 0              | 0              | 2              | 0  | 0              | 0              | 2              |
| <i>h4</i> | -0.204  | 2                                             | 6              | 3              | 0              | 0  | 1              | 8              | 27             | 0 | 0              | 0              | 0              | 0  | 31             | 20             | 0              |
| <i>h5</i> | -0.211  | 1                                             | 3              | 3              | 0              | 0  | 1              | 10             | 39             | 0 | 0              | 0              | 0              | 0  | 32             | 10             | 0              |
| <i>h6</i> | -0.224  | 0                                             | 1              | 1              | 11             | 0  | 1              | 14             | 53             | 0 | 0              | 0              | 0              | 0  | 4              | 0              | 14             |
| <i>h7</i> | -0.229  | 1                                             | 7              | 1              | 1              | 1  | 4              | 3              | 17             | 1 | 2              | 0              | 0              | 1  | 58             | 2              | 1              |

Table S6. ZINDO electronic states and predominant transitions of deprotonated HPPCO molecule.

| State               | nm  | f     | Predominant transition                                                  | comment                                                                                                                       |
|---------------------|-----|-------|-------------------------------------------------------------------------|-------------------------------------------------------------------------------------------------------------------------------|
| <b>A-absorption</b> |     |       |                                                                         |                                                                                                                               |
| 1A                  | 405 | 0.090 | $h1 \rightarrow l1$                                                     | $\pi(R4;O;ph) \rightarrow \pi^*(R1-4)$                                                                                        |
| 2A                  | 385 | 0.040 | $h1 \rightarrow l1; h4 \rightarrow l1$                                  | $\pi(R4;O;ph) \rightarrow \pi^*(R1-4)$                                                                                        |
| 3A                  | 341 | 0.262 | $h1 \rightarrow l3$                                                     | $\pi(R4;O;ph) \rightarrow \pi^*(R1-4)$                                                                                        |
| 4A                  | 325 | 0.159 | $h2 \rightarrow l1$                                                     | $\pi(R1-4,N) \rightarrow \pi^*(R1-4)$                                                                                         |
| 5A                  | 325 | 0.057 | $h7 \rightarrow l7, l1;$<br>$h1 \rightarrow l2;$<br>$h2 \rightarrow l1$ | $n(O) + \pi(ph) \rightarrow \pi^*(R1-4);$<br>$\pi(R4;O;ph) \rightarrow \pi^*(R1-4);$<br>$\pi(R1-4,N) \rightarrow \pi^*(R1-4)$ |
| <b>B-absorption</b> |     |       |                                                                         |                                                                                                                               |
| 6A                  | 315 | 0.059 | $h1 \rightarrow l2, l5$                                                 | $\pi(R4;O;ph) \rightarrow \pi^*(R1-4), \pi^*(ph)$                                                                             |
| 7A                  | 311 | 0.018 | $h1 \rightarrow l6$                                                     | $\pi(R4;O;ph) \rightarrow \pi^*(ph)$                                                                                          |
| 8A                  | 307 | 0.263 | $h3 \rightarrow l1$                                                     | $\pi(R1-2) \rightarrow \pi^*(R1-4)$                                                                                           |
| 9A                  | 291 | 0.032 | $h1 \rightarrow l7, l4$                                                 | $\pi(R4;O;ph) \rightarrow \pi^*(R1-4;O), \pi^*(R1-4)$                                                                         |
| 10A                 | 279 | 0.156 | $h3 \rightarrow l3, l2$                                                 | $\pi(R1-2) \rightarrow \pi^*(R1-4)$                                                                                           |
| 11A                 | 275 | 0.007 | $h1 \rightarrow l3, l2, l5$                                             | $\pi(R4;O;ph) \rightarrow \pi^*(R1-4), \pi^*(ph)$                                                                             |
| 12A                 | 266 | 0.009 | $h1 \rightarrow l10, l2$                                                | $\pi(R4;O;ph) \rightarrow \pi^*(R1-4)$                                                                                        |
| <b>C-absorption</b> |     |       |                                                                         |                                                                                                                               |
| 13A                 | 256 | 0.177 | $h3 \rightarrow l3; h1 \rightarrow l4$                                  | $\pi(R1-2) \rightarrow \pi^*(R1-4);$<br>$\pi(R4;O;ph) \rightarrow \pi^*(R1-4)$                                                |
| 14A                 | 253 | 0.634 | $h2 \rightarrow l2, l3$                                                 | $\pi(R1-4,N) \rightarrow \pi^*(R1-4)$                                                                                         |
| 15A                 | 251 | 0.508 | $h1 \rightarrow l7$                                                     | $\pi(R,2O,N) \rightarrow \pi^*(R)$                                                                                            |
| 16A                 | 247 | 0.619 | $h3 \rightarrow l2, h2 \rightarrow l2, h1 \rightarrow l4$               | $\pi(R1-2) \rightarrow \pi^*(R1-4)$                                                                                           |
| 17A                 | 239 | 0.021 | $h4 \rightarrow l1$                                                     | $n(O) + \pi(ph) \rightarrow \pi^*(R1-4)$                                                                                      |
| 18A                 | 236 | 0.257 | $h5 \rightarrow l5; h6 \rightarrow l6$                                  | $n(O) + \pi(ph) \rightarrow \pi^*(ph);$<br>$\pi(ph) + n(O) \rightarrow \pi^*(ph)$                                             |
